# Supplementary material for: Modeling the role of microRNA-449a in the regulation of the G2/M cell cycle checkpoint in prostate LNCaP cells under ionizing radiation
Source: PubMed Central journal article supplement (PMC6053189; doi:10.1371/journal.pone.0200768), 2018-07-19
Supplement: pone.0200768.s003.pdf [file pone.0200768.s003.pdf]

Modeling the role of microRNA-449a in  
the regulation of the G2/M cell cycle  
checkpoint in prostate LNCaP cells  
under ionizing radiation  
*S3 file*

Shantanu Gupta<sup>1,+</sup>, Daner A. Silveira<sup>1,+</sup> and José C. M.  
Mombach<sup>1,+,\*</sup>

<sup>1</sup>Departamento de Física, Universidade Federal de Santa Maria, Santa Maria, RS,  
97105-900, Brazil

\*Corresponding author (e-mail: [jcmombach@ufsm.br](mailto:jcmombach@ufsm.br))

<sup>+</sup>These authors contributed equally to this work

## List of stable states of the model in section Model validation

| IR | ATM | ATR | Mdm2 | p53-MAIN | p53-INP1 | p53-Arrest | Wip1 | p53-Killer | p21 | 14-3-3s | miR-449a | c-Myc | Cdc25ABC | RB | E2F1 | Cdc2-CycB | Sirt-1 | Proliferation | G2-M-Arrest | G2-M-Apoptosis |
|----|-----|-----|------|----------|----------|------------|------|------------|-----|---------|----------|-------|----------|----|------|-----------|--------|---------------|-------------|----------------|
| 1  | 1   | 1   | 1    | 1        | 1        | 1          | 1    | 1          | 1   | 1       | 1        | 1     | 1        | 1  | 1    | 1         | 1      | 1             | 1           | 1              |
| 1  | 1   | 1   | 1    | 1        | 1        | 1          | 1    | 1          | 1   | 1       | 1        | 1     | 1        | 1  | 1    | 1         | 1      | 1             | 1           | 1              |

Figure 1: Wild type case

| IR | ATM | ATR | Mdm2 | p53-MAIN | p53-INP1 | p53-Arrest | Wip1 | p53-Killer | p21 | 14-3-3s | miR-449a | c-Myc | Cdc25ABC | RB | E2F1 | Cdc2-CycB | Sirt-1 | Proliferation | G2-M-Arrest | G2-M-Apoptosis |
|----|-----|-----|------|----------|----------|------------|------|------------|-----|---------|----------|-------|----------|----|------|-----------|--------|---------------|-------------|----------------|
| 1  | 1   | 1   | 1    | 1        | 1        | 1          | 1    | 1          | 1   | 1       | 1        | 1     | 1        | 1  | 1    | 1         | 1      | 1             | 1           | 1              |
| 1  | 1   | 1   | 1    | 1        | 1        | 1          | 1    | 1          | 1   | 1       | 1        | 1     | 1        | 1  | 1    | 1         | 1      | 1             | 1           | 1              |

Figure 2: Knockout (KO) of miR-449a

| IR | ATM | ATR | Mdm2 | p53-MAIN | p53-INP1 | p53-Arrest | Wip1 | p53-Killer | p21 | 14-3-3s | miR-449a | c-Myc | Cdc25ABC | RB | E2F1 | Cdc2-CycB | Sirt-1 | Proliferation | G2-M-Arrest | G2-M-Apoptosis |
|----|-----|-----|------|----------|----------|------------|------|------------|-----|---------|----------|-------|----------|----|------|-----------|--------|---------------|-------------|----------------|
| 1  |     | 1   |      | 1        | 1        | 1          | 1    | 1          | 1   | 1       | 1        |       |          | 1  |      |           |        |               | 1           | 1              |
| 1  | 1   | 1   |      | 1        | 1        |            |      | 1          | 1   | 1       | 1        |       |          | 1  |      |           |        |               | 1           | 1              |

Figure 3: Ectopic expression (E1) of miR-449a, Inhibits proliferation and induce G2/M-Arrest and apoptosis

| IR | ATM | ATR | Mdm2 | p53-MAIN | p53-INP1 | p53-Arrest | Wip1 | p53-Killer | p21 | 14-3-3s | miR-449a | c-Myc | Cdc25ABC | RB | E2F1 | Cdc2-CycB | Sirt-1 | Proliferation | G2-M-Arrest | G2-M-Apoptosis |
|----|-----|-----|------|----------|----------|------------|------|------------|-----|---------|----------|-------|----------|----|------|-----------|--------|---------------|-------------|----------------|
|    |     |     | 1    |          |          |            |      |            |     |         |          | 1     | 1        |    | 1    | 1         | 1      | 1             |             |                |
| 1  |     | 1   |      | 1        | 1        | 1          | 1    |            | 1   | 1       | 1        |       |          | 1  |      |           |        |               | 1           | 1              |
| 1  | 1   | 1   |      | 1        | 1        |            |      | 1          | 1   | 1       | 1        |       |          | 1  |      |           |        |               | 1           | 1              |

Figure 4: Negative correlation between c-Myc and miR-449a in response to IR

| IR | ATM | ATR | Mdm2 | p53-MAIN | p53-INP1 | p53-Arrest | Wip1 | p53-Killer | p21 | 14-3-3s | miR-449a | c-Myc | Cdc25ABC | RB | E2F1 | Cdc2-CycB | Sirt-1 | Proliferation | G2-M-Arrest | G2-M-Apoptosis |
|----|-----|-----|------|----------|----------|------------|------|------------|-----|---------|----------|-------|----------|----|------|-----------|--------|---------------|-------------|----------------|
|    |     |     | 1    |          |          |            |      |            |     |         |          |       | 1        |    | 1    | 1         | 1      | 1             |             |                |
| 1  |     | 1   |      | 1        | 1        | 1          | 1    |            | 1   | 1       | 1        |       |          | 1  |      |           |        |               | 1           | 1              |
| 1  | 1   | 1   |      | 1        | 1        |            |      | 1          | 1   | 1       | 1        |       |          | 1  |      |           |        |               | 1           | 1              |

Figure 5: Knockout (KO) of c-Myc induce G2/M-Arrest and Apoptosis
