# Supplementary material for: Modeling the role of microRNA-449a in the regulation of the G2/M cell cycle checkpoint in prostate LNCaP cells under ionizing radiation
Source: PubMed Central journal article supplement (PMC6053189; doi:10.1371/journal.pone.0200768), 2018-07-19
Supplement: pone.0200768.s004.pdf [file pone.0200768.s004.pdf]

Modeling the role of microRNA-449a in  
the regulation of the G2/M cell cycle  
checkpoint in prostate LNCaP cells  
under ionizing radiation  
*S4 file*

Shantanu Gupta<sup>1,+</sup>, Daner A. Silveira<sup>1,+</sup> and José C. M.  
Mombach<sup>1,+,\*</sup>

<sup>1</sup>Departamento de Física, Universidade Federal de Santa Maria, Santa Maria, RS,  
97105-900, Brazil

\*Corresponding author (e-mail: [jcmombach@ufsm.br](mailto:jcmombach@ufsm.br))

<sup>+</sup>These authors contributed equally to this work

**Other positive and negative circuits with functionality affected by p53-MAIN and RB (and not regulated by miR-449a). These circuit perturbations make G2/M-arrest more probable than apoptosis. Probabilities were calculated using the Monte Carlo algorithm (see section Methods).**

Table 1: Perturbations of the positive circuit regulated by p53-MAIN. E1 represents GoF and KO represents LoF of the corresponding element of the circuit.

| Circuits |               | p53-MAIN                       |                         |
|----------|---------------|--------------------------------|-------------------------|
| Positive | Perturbations | E1                             |                         |
| E2F1/ATM | KO/KO         | Phenotype<br>G2/M or Apoptosis | Probability<br>71%, 29% |
|          | KO/E1         | G2/M or Apoptosis              | 72%, 28%                |

Table 2: Perturbations of the negative circuit regulated by RB. E1 represents GoF and KO represents LoF of the corresponding element of the circuit.

| Circuit           | RB            |                                |                         |
|-------------------|---------------|--------------------------------|-------------------------|
| Negative          | Perturbations | E1                             |                         |
| E2F1/Cdc25ABC/ATM | KO/KO/KO      | Phenotype<br>G2/M or Apoptosis | Probability<br>71%, 29% |
|                   | KO/KO/E1      | G2/M or Apoptosis              | 70%, 30%                |
|                   | KO/E1/KO      | G2/M or Apoptosis              | 69%, 31%                |
|                   | KO/E1/E1      | G2/M or Apoptosis              | 70%, 30%                |
