# Supplementary material for: Modeling the role of microRNA-449a in the regulation of the G2/M cell cycle checkpoint in prostate LNCaP cells under ionizing radiation
Source: PubMed Central journal article supplement (PMC6053189; doi:10.1371/journal.pone.0200768), 2018-07-19
Supplement: pone.0200768.s005.pdf [file pone.0200768.s005.pdf]

Modeling the role of microRNA-449a in  
the regulation of the G2/M cell cycle  
checkpoint in prostate LNCaP cells  
under ionizing radiation  
*S1 Table*

Shantanu Gupta<sup>1,+</sup>, Daner A. Silveira<sup>1,+</sup> and José C. M.  
Mombach<sup>1,+,\*</sup>

<sup>1</sup>Departamento de Física, Universidade Federal de Santa Maria, Santa Maria, RS,  
97105-900, Brazil

\*Corresponding author (e-mail: jcmombach@ufsm.br)

<sup>+</sup>These authors contributed equally to this work

## Model elements

Table 1: Model elements / corresponding molecules or cytotoxic agent

| <b>Nodes</b> | <b>Description</b>                                      |
|--------------|---------------------------------------------------------|
| IR           | Ionizing radiation                                      |
| ATM          | ATM serine/threonine kinase                             |
| ATR          | ATR serine/threonine kinase                             |
| miR-449a     | MicroRNA 449a                                           |
| Sirt-1       | Sirtuin 1                                               |
| p53-MAIN     | Tumor suppressor p53 protein                            |
| Mdm2         | E3 ubiquitin protein ligase homolog protein             |
| p53-Arrest   | Tumor suppressor p53 protein (Ser-15 and Ser-20)        |
| p53-Killer   | Tumor suppressor p53 protein (Ser-46)                   |
| p53-INP1     | Tumor protein p53 inducible nuclear protein 1           |
| Wip1         | Protein Phosphatase 1D                                  |
| p21          | cyclin-dependent kinase inhibitor 1A                    |
| 14-3-3s      | 14-3-3 Sigma                                            |
| c-Myc        | Myc proto-oncogene protein                              |
| E2F1         | E2F transcription factor 1                              |
| RB           | Retinoblastoma 1 protein                                |
| Cdc25ABC     | Cell division cycle 25 family (A/B/C)                   |
| Cdc2-CycB    | Cell division cycle protein 2 homolog/ Cyclin B complex |
